# Supplementary material for: Stabilization of n-cadmium telluride photoanodes for water oxidation to O2(g) in aqueous alkaline electrolytes using amorphous TiO2 films formed by atomic-layer deposition
Source: Royal Society of Chemistry journal article supplement (doi:10.1039/c4ee01914h), 2014-01-01
Supplement: c4ee01914h1.pdf [file c4ee01914h1.pdf]

*Supplementary Information for:*

STABILIZATION OF N-CADMIUM TELLURIDE  
PHOTOANODES FOR WATER OXIDATION TO O<sub>2</sub>(g) IN  
AQUEOUS ALKALINE ELECTROLYTES USING  
AMORPHOUS TiO<sub>2</sub> FILMS FORMED BY ATOMIC-  
LAYER-DEPOSITION

MICHAEL F. LICHTERMAN<sup>1,2</sup>, AZHAR I. CARIM<sup>1</sup>, MATTHEW T. MCDOWELL<sup>1,2</sup>, SHU HU<sup>1,2</sup>,

HARRY B. GRAY<sup>2,3</sup>, BRUCE S. BRUNSCHWIG<sup>1,3</sup>, AND NATHAN S. LEWIS<sup>1-4</sup>

<sup>1</sup>Division of Chemistry and Chemical Engineering

<sup>2</sup>The Joint Center for Artificial Photosynthesis

<sup>3</sup>Beckman Institute

<sup>4</sup>Kavli Nanoscience Institute

California Institute of Technology

Pasadena, CA 91125

## **S1. Contents**

This document contains detailed descriptions of the experimental procedures used in this work (Section S2), photoelectrochemical data detailing the effect of Br<sub>2</sub>/CH<sub>3</sub>OH etching on photoelectrode performance (Section S3), energy dispersive X-ray spectroscopy of the interface of an n-CdTe/TiO<sub>2</sub>/Ni electrode (Section S4), X-ray photoelectron spectroscopic analysis of the Br<sub>2</sub>/CH<sub>3</sub>OH etched n-CdTe surface (S5), and photoelectrochemical data describing the stability of n-CdTe/Ni electrodes in comparison to n-CdTe/TiO<sub>2</sub>/Ni electrodes (Section S6)

## S2. Experimental Methods

### *Preparation of Electrodes*

CdTe pieces were cut from an n-CdTe(111) (carrier concentration  $5.5 \times 10^{17} \text{ cm}^{-3}$ ) wafer that had previously been polished and contacted at the back with evaporated In. Pieces were etched for 30 s in a freshly prepared solution of  $\text{Br}_2$  (Sigma Aldrich, 99.999%)/ $\text{CH}_3\text{OH}$  (EMD Millipore, >99.9%) dissolved in  $\text{CH}_3\text{OH}$ , rinsed vigorously with  $\text{CH}_3\text{OH}$ , and immersed in  $\text{CH}_3\text{OH}$  until being dried with a stream of  $\text{N}_2(\text{g})$  before being placed in the atomic-layer deposition (ALD) chamber (Cambridge Nanotechnology).  $\text{TiO}_2$  was deposited by ALD using  $\text{H}_2\text{O}$  and tetrakis(dimethylamido)titanium(IV) (TDMAT) (Sigma, 99.999%). A 0.1 s pulse of TDMAT was followed by a 15 s purge with  $\text{N}_2(\text{g})$  at 20 sccm, followed by a 0.015 s pulse of  $\text{H}_2\text{O}$  and another 15 s purge. The coating cycle was repeated 2500 times, and the deposition was performed out at  $150^\circ\text{C}$ . Substantial experimentation was performed to optimize this system, and varying the ALD temperatures generally resulted in poorer or completely nonconductive films. The results presented herein are currently the most optimized results from these experiments thus far. Ni deposition was performed in a sputterer (AJA International) under an Ar atmosphere at 8.5 mtorr. RF power was used with the Ni target (Kurt Lesker, 99.995%) to deposit  $\sim 2 \text{ nm}$  of material.

Final assembly of the electrodes began with application of Ga-In eutectic (Sigma Aldrich, 99.99%) onto the back of the n-CdTe, followed by use of Ag paint (SPI Supplies) to contact the sample to a Cu wire. The area around the wire and n-CdTe was then coated with non-conductive epoxy (Hysol 9460). Electrode areas were derived from computer captured optical images analyzed with ImageJ software.

### *Electrode Characterization*

Spectral response data were collected using a 300 W Xe lamp in conjunction with a monochromator (Newport Oriel Instruments) and lock-in amplifiers (Stanford Research Instruments). The voltammetry, chronoamperometry, and electrochemical impedance experiments were performed using a Bio-Logic SP-200 potentiostat.

Voltammetric measurements in pH 14 KOH (aq) were performed using a 3- or 4-necked 50-mL round-bottom flask that had been modified with a planar quartz window. The power of the Xenon lamp (Newport) used for illumination was adjusted to produce the desired incident illumination power. A ground glass diffuser ensured a uniform illumination intensity. The light intensity was adjusted to produce the same short-circuit current density as produced by 100 mW cm<sup>-2</sup> of Air Mass (AM) 1.5G sunlight on a secondary standard Si photodiode. A three-electrode configuration was used with a saturated calomel electrode (SCE) or a Ag/AgCl(sat) reference electrode (BAS Inc.) and a Pt gauze counter electrode located in a fritted compartment that contained the same pH 14 or Fe(CN)<sub>6</sub><sup>3-/4-</sup> electrolyte as in the main cell compartment.

For experiments with Fe(CN)<sub>6</sub><sup>3-/4-</sup>, a solution containing 0.050 M K<sub>3</sub>Fe(CN)<sub>6</sub>, 0.350 M K<sub>4</sub>Fe(CN)<sub>6</sub>, and 0.500 M K<sub>2</sub>SO<sub>4</sub>(aq) was prepared prior to use. This solution was contained in an electrochemical cell that had a small separation between the cell edge and the working electrode surface, to minimize the absorbing effects of the Fe(CN)<sub>6</sub><sup>3-/4-</sup> solution. A Pt wire and Pt gauze were the reference and counter electrodes, respectively, for these measurements.

For O<sub>2</sub>(g) evolution experiments, a Neofix fluorescence probe was used in an airtight cell, along with a Ag/AgCl(sat) reference electrode. The Pt gauze counter electrode was positioned in a separate, fritted compartment. The cell volume was 51 mL, and the cell was purged with a stream of Ar(g) for ~1 h prior to data collection. The experiment was run for 30 min after a 10 min waiting period at open circuit, then held at open circuit for ten minutes, then

run for another 30 minutes to show that oxygen had been produced electrochemically and did not simply leak into the cell. The electrode area was 0.25 cm<sup>2</sup>.

Scanning-electron micrographs (SEM) were obtained using a FEI Nova NanoSEM 450 at an accelerating voltage of 15 kV with a working distance of 5 mm and an in-lens secondary electron detector. Energy-dispersive X-ray spectroscopy was performed in the SEM at a working distance of 12 mm, using an accelerating voltage of 15 kV and an Oxford Instruments Si drift detector.

X-ray photoelectron spectroscopy (XPS) was performed using a Kratos Axis Nova system with a base pressure of  $< 2 \times 10^{-9}$  torr. A monochromatic Al K $\alpha$  source was used to irradiate the sample with X-rays with an energy of 1486.7 eV at a power of 450 W. A hemispherical analyzer oriented for detection along the sample surface normal was used for maximum depth sensitivity. High-resolution spectra were acquired at a resolution of 50 meV with a pass energy of 10 eV. An octopole ion gun was used to sputter-etch the sample surface with 500 eV Ar<sup>+</sup> ions in increments of 15 s.

**S1. Photoelectrochemical Behavior of n-CdTe/TiO<sub>2</sub>/Ni Electrodes with or without Etching**

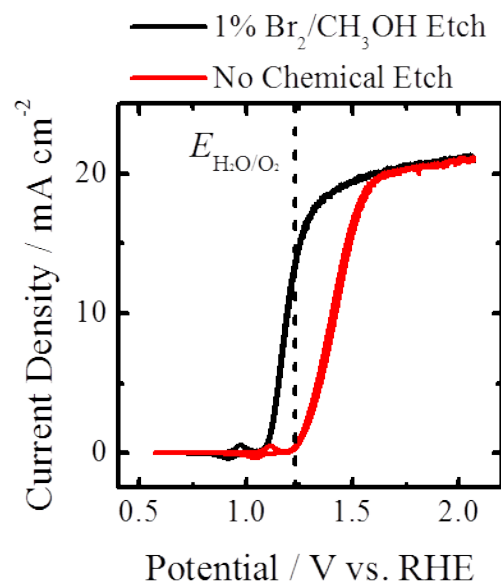

**Figure S1.** *J-E* data of n-CdTe/TiO<sub>2</sub>/Ni photoelectrodes in pH = 14 KOH(aq) under illumination with a Xe arc lamp calibrated to 100 mW cm<sup>-2</sup> of AM 1.5G illumination. The n-CdTe was either etched with 1% Br<sub>2</sub>/CH<sub>3</sub>OH, or not chemically etched at all (beyond cleaning with CH<sub>3</sub>OH) prior to deposition of the TiO<sub>2</sub>.

## S2. Energy Dispersive X-Ray Spectroscopy of an n-CdTe/TiO<sub>2</sub>/Ni Interface

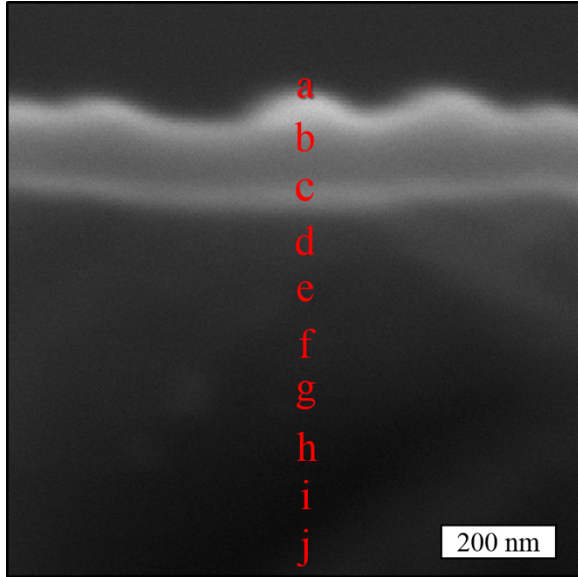

**Figure S2.** Cross-sectional scanning-electron micrograph of an n-CdTe/TiO<sub>2</sub>/Ni electrode showing the ALD-grown TiO<sub>2</sub> film above the n-CdTe wafer section. The labels denote the positions where the EDS data in Table S1 were acquired.

| Position | Cd   | Te   | Ti   | Ni   |
|----------|------|------|------|------|
| a        | 1.16 | 1.00 | 3.70 | 2.04 |
| b        | 1.06 | 1.00 | 4.83 | 0.39 |
| c        | 1.09 | 1.00 | 2.64 |      |
| d        | 0.93 | 1.00 | 0.69 |      |
| e        | 0.93 | 1.00 | 0.30 |      |
| f        | 0.92 | 1.00 | 0.17 |      |
| g        | 0.99 | 1.00 | 0.12 |      |
| h        | 0.97 | 1.00 | 0.05 |      |
| i        | 0.94 | 1.00 |      |      |
| j        | 1.00 | 1.00 |      |      |

**Table S1.** Atomic ratios derived from EDS acquired from an n-CdTe/TiO<sub>2</sub>/Ni electrode at the positions indicated in Figure S1. All of the values were normalized to those of Te.

### S3. X-Ray Photoelectron Spectroscopic Analysis of the Br<sub>2</sub>/CH<sub>3</sub>OH Etched n-CdTe Surface

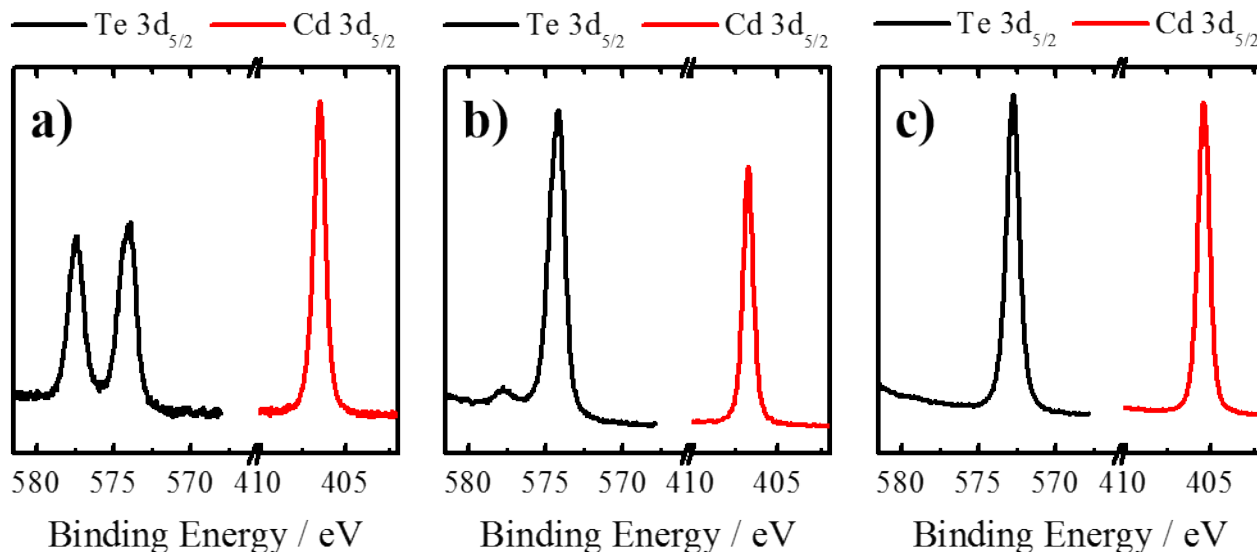

**Figure S3.** High-resolution X-ray photoelectron spectra in the regions of the Te 3d<sub>5/2</sub> and Cd 3d<sub>5/2</sub> core levels of (a) as-delivered n-CdTe. (b) 1% Br<sub>2</sub>/CH<sub>3</sub>OH etched n-CdTe and (c) the same as (b) after 15 s of Ar<sup>+</sup> sputter-etching.

| Preparation                             | Ratio Cd:Te |
|-----------------------------------------|-------------|
| As-Delivered                            | .93         |
| Etched                                  | .75         |
| Etched / 15 s Ar <sup>+</sup> Sputtered | 1.07        |
| Etched / 30 s Ar <sup>+</sup> Sputtered | 1.16        |
| Etched / 45 s Ar <sup>+</sup> Sputtered | 1.16        |

**Table S2.** Te:Cd atomic ratio as determined by X-Ray photoelectron spectroscopy for an as-delivered n-CdTe, n-CdTe etched with 1 % Br<sub>2</sub>/CH<sub>3</sub>OH and n-CdTe etched with 1 % Br<sub>2</sub>/CH<sub>3</sub>OH and then sputter-etched with Ar<sup>+</sup> ions for 15s, 30 s or 45 s.



#### S4. Photoelectrochemical Stability of n-CdTe/Ni and n-CdTe/TiO<sub>2</sub>/Ni Electrodes

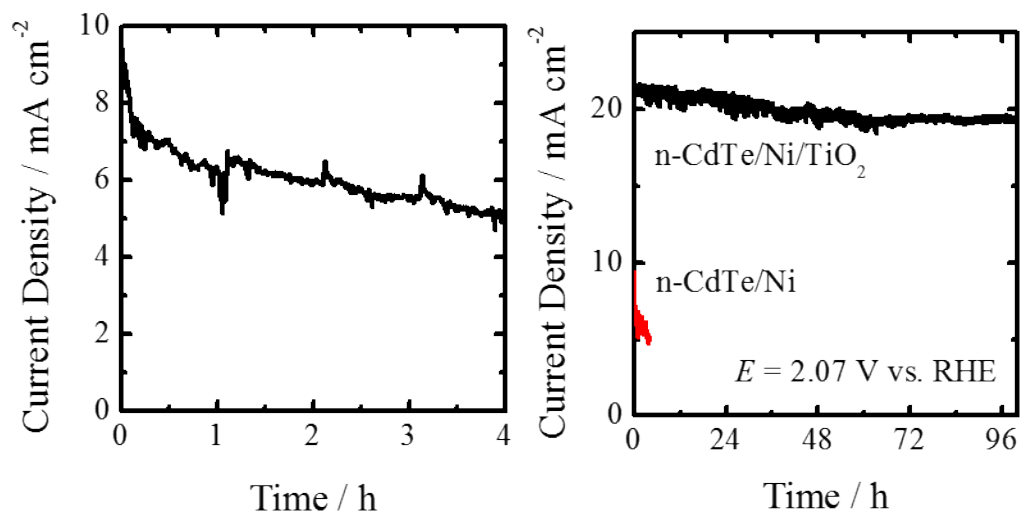

**Figure S4.** Current density as a function of time during potentiostatic electrolysis with an n-CdTe/Ni electrode (left) and plotted against data from an n-CdTe/TiO<sub>2</sub>/Ni electrode under the same conditions at 2.07 V vs. RHE in pH = 14 KOH(aq) under illumination with a Xe arc lamp calibrated to 100 mW cm<sup>-2</sup> of AM 1.5G illumination.

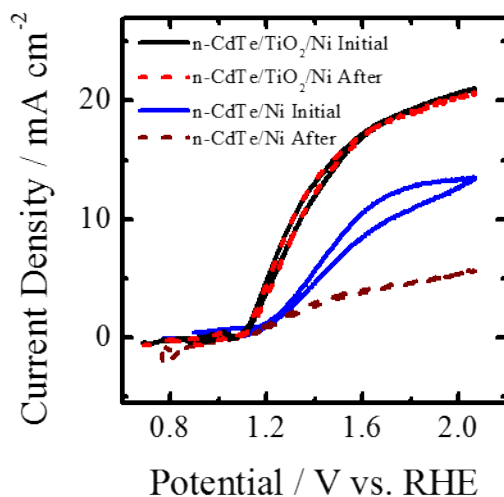

**Figure S5.** *J-E* data obtained with n-CdTe/Ni and n-CdTe/TiO<sub>2</sub>/Ni electrodes, respectively, in pH = 14 KOH(aq) under illumination by a Xe arc lamp calibrated to 100 mW cm<sup>-2</sup> of AM 1.5G illumination. *J-E* data were obtained before and after 4 h of potentiostatic electrolysis under illumination at 2.07 V vs. RHE.
